# Supplementary material
Source: ML conference proceedings conference paper supplement (https://openaccess.thecvf.com/content/ICCV2023/html/Wang_Improved_Visual_Fine-tuning_ICCV_2023_paper.html)
Supplement: Supplementary file 1 [file Wang_Improved_Visual_Fine-tuning_ICCV_2023_supplemental.pdf]

# Improved Visual Fine-tuning with Natural Language Supervision Supplementary

Junyang Wang<sup>1\*</sup> Yuanhong Xu<sup>2</sup> Juhua Hu<sup>3</sup> Ming Yan<sup>2</sup> Jitao Sang<sup>1,4</sup> Qi Qian<sup>5†</sup>

<sup>1</sup> School of Computer and Information Technology & Beijing Key Lab of Traffic Data Analysis and Mining, Beijing Jiaotong University, Beijing, China

<sup>2</sup> DAMO Academy, Alibaba Group, Hangzhou, China

<sup>3</sup> School of Engineering and Technology, University of Washington, Tacoma, WA 98402, USA

<sup>4</sup> Peng Cheng Lab, Shenzhen, China

<sup>5</sup> DAMO Academy, Alibaba Group, Bellevue, WA 98004, USA

{junyangwang, jtsang}@bjtu.edu.cn, {yuanhong.xuyh, ym119608, qi.qian}@alibaba-inc.com, juhuah@uw.edu

## 1. Theoretical Analysis

### 1.1. Proof of Theorem 1

*Proof.* Note that with the fixed features, the function  $\mathcal{L}(\theta^0, W)$  is convex in  $W$ . Assuming the function is  $m$ -strongly convex such that for the arbitrary  $(W_1, W_2)$ , we have

$$\mathcal{L}(W_1) \geq \mathcal{L}(W_2) + \langle \nabla_{W_2} \mathcal{L}(W_2), W_1 - W_2 \rangle + \frac{m}{2} \|W_1 - W_2\|_F^2$$

Since  $W^0$  is the optimal solution for  $\mathcal{L}(\theta^0, W)$ , we have

$$\begin{aligned} \|W^T - W^0\|_F^2 &\leq \frac{2}{m} (\mathcal{L}(\theta^0, W^T) - \mathcal{L}(\theta^0, W^0)) \\ &= \frac{2}{m} (\mathcal{L}(\theta^0, W^T) - \mathcal{L}(\theta^T, W^T) + \mathcal{L}(\theta^T, W^T) - \mathcal{L}(\theta^0, W^0)) \\ &\leq \frac{2}{m} (\mathcal{L}(\theta^0, W^T) - \mathcal{L}(\theta^T, W^T)) \end{aligned} \quad (1)$$

The last inequality is due to that fine-tuning can obtain a better performance than linear probing, i.e.,  $\mathcal{L}(\theta^T, W^T) \leq \mathcal{L}(\theta^0, W^0)$ .

For fine-tuning, the loss function  $\mathcal{L}$  is non-convex but can be Lipschitz continuous. With  $L/2$  as the parameter of Lipschitz continuous, we have

$$\mathcal{L}(\theta^0, W^T) - \mathcal{L}(\theta^T, W^T) \leq \frac{L}{2} \|\theta^0 - \theta^T\|_F \leq \frac{L}{2} \epsilon$$

where the last inequality is from the constraint of fine-tuning. Taking it back to the Eqn. 1, the result is obtained.  $\square$

\*Work done during internship at DAMO Academy, Alibaba Group.

†Corresponding author

### 1.2. Proof of Proposition 1

*Proof.* Note that the backbone is updated by SGD

$$\theta^t = \theta^{t-1} - \eta_t \nabla \mathcal{L}_{\theta^{t-1}}$$

Adding  $t$  from 0 to  $T$ , we have  $\theta^T = \theta^0 - \sum_t \eta_t \nabla \mathcal{L}_{\theta^{t-1}}$ . By applying the triangle inequality, the difference between  $\theta^T$  and  $\theta^0$  can be bounded as

$$\begin{aligned} \|\theta^0 - \theta^T\|_F &= \left\| \sum_t \eta_t \nabla \mathcal{L}_{\theta^{t-1}} \right\|_F \\ &\leq \sum_t \eta_t \|\nabla \mathcal{L}_{\theta^{t-1}}\|_F \leq \sum_t \eta_t \delta \end{aligned}$$

With a cosine decay strategy and the initial learning rate as  $\eta_0$ , we have

$$\|\theta^0 - \theta^T\|_F \leq 0.5\delta\eta_0 \int_0^\pi 1 + \cos(x) dx = 0.5\eta_0\pi\delta$$

$\square$

### 1.3. Proof of Theorem 2

*Proof.* According to the definition, we have

$$P_{i,k} = \frac{\exp((\mathbf{x}_i - \mathbf{w}_{y_i})^\top \mathbf{w}_k + \mathbf{w}_{y_i}^\top \mathbf{w}_k)}{\sum_j \exp((\mathbf{x}_i - \mathbf{w}_{y_i})^\top \mathbf{w}_j + \mathbf{w}_{y_i}^\top \mathbf{w}_j)}$$

With Cauchy-Schwarz inequality, we have

$$-\gamma \|\mathbf{x}_i - \mathbf{w}_{y_i}\|_2 \leq (\mathbf{x}_i - \mathbf{w}_{y_i})^\top \mathbf{w}_k \leq \gamma \|\mathbf{x}_i - \mathbf{w}_{y_i}\|_2$$

Due to the fact that exponential function is monotone, we have

$$P_{i,k} \leq \frac{c \exp(\mathbf{w}_{y_i}^\top \mathbf{w}_k)}{\sum_j \exp(\mathbf{w}_{y_i}^\top \mathbf{w}_j) / c} = c^2 P_{y_i, k}$$

| Method         | Aircraft     | Caltech | Cars         | C10   | C100  | CUB          | DTD          | Flower       | Food  | Pet          | SUN          | Avg.         |
|----------------|--------------|---------|--------------|-------|-------|--------------|--------------|--------------|-------|--------------|--------------|--------------|
| CE + LS (mean) | 76.80        | 94.76   | 89.21        | 98.02 | 88.59 | 78.79        | 75.95        | 96.12        | 88.29 | 91.57        | 69.92        | 86.17        |
| CE + LS (std)  | 0.46         | 0.17    | 0.12         | 0.08  | 0.16  | 0.08         | 0.09         | 0.50         | 0.31  | 0.04         | 0.34         | 0.21         |
| TeS (mean)     | <b>77.80</b> | 94.78   | <b>90.01</b> | 97.97 | 88.48 | <b>80.01</b> | <b>77.01</b> | <b>96.74</b> | 88.49 | <b>92.17</b> | <b>70.98</b> | <b>86.77</b> |
| TeS (std)      | 0.16         | 0.10    | 0.10         | 0.11  | 0.10  | 0.32         | 0.12         | 0.10         | 0.08  | 0.13         | 0.11         | 0.13         |

Table 1. Comparison with ViT pre-trained by CLIP. The significantly better method examined by Student’s t-test is bolded.

and

$$P_{i,k} \geq \frac{\exp(\mathbf{w}_{y_i}^\top \mathbf{w}_k)/c}{\sum_j^C c \exp(\mathbf{w}_{y_i}^\top \mathbf{w}_j)} = \frac{1}{c^2} P_{y_i,k}$$

where  $c = \exp(\gamma \|\mathbf{x}_i - \mathbf{w}_{y_i}\|_2)$ . □

## 2. Repeated Experiments on CLIP

We repeat experiments for the vision encoder of CLIP by 3 times and conduct Student’s t-test at the 95% confidence level in Table 1. It confirms that our method is significantly better than the best baseline on average.
